# Supplementary material for: Sea urchin-like cobalt–iron phosphide as an active catalyst for oxygen evolution reaction
Source: Royal Society of Chemistry journal article supplement (doi:10.1039/c5nr08763e), 2016-01-01
Supplement: c5nr08763e1.pdf [file c5nr08763e1.pdf]

## Supplementary Information

# Sea Urchin-like Cobalt-Iron Phosphide Nanostructures as an Efficient Catalyst for the Oxygen Evolution Reaction

Adriana Mendoza-Garcia<sup>†</sup>, Dong Su<sup>§</sup> and Shouheng Sun<sup>†,\*</sup>

\*To whom correspondence should be addressed. Email: shouheng\_sun@brown.edu

### Affiliations:

<sup>†</sup>Department of Chemistry, Brown University, Providence, Rhode Island 02912, USA.

<sup>§</sup>Center for Functional Nanomaterials, Brookhaven National Laboratory, Upton, NY 11973, USA.

**Chemicals and Materials:** Fe(acac)<sub>3</sub>, Co(acac)<sub>2</sub> (acac =acetylacetonate), oleylamine (OAm, >70%), oleic acid (OAc), benzyl ether (BE, >98%), 1-octadecene (ODE, 90%) hexane, ethanol and Nafion (5%) were purchased from Sigma Aldrich. Sodium oleate (90%) was from Spectrum Chemicals. Trioctylphosphine (97%) was from Strem Chemicals and the commercial C-Ir catalyst (20% on Vulcan XC-72) was from Premetek.

**Instrumentation:** Transmission electron microscopy (TEM) and high resolution TEM (HRTEM) samples were prepared by depositing a drop of diluted nanoparticle (NP) dispersion in hexane on formvar/carbon coated copper grids. Standard TEM images were obtained from a Philips CM20 operating at 200 kV. TEM with a field-emission electron source and Scanning TEM analyses were obtained on a Hitachi HD2700C (200 kV) with a probe aberration-correction at Brookhaven National Laboratory. HRTEM images were obtained from a JEOL 2010 with an S2 accelerating voltage of 200 kV. Metal components within NPs were analyzed by inductively coupled plasma-atomic emission spectroscopy (ICP-AES) on a JY2000 UltraTrace ICP Atomic Emission Spectrometer equipped with a JY AS 421

autosampler and 2400g/mm holographic grating, and the mass ratios were converted into atomic ratios. Electrochemical measurements were carried out on an Autolab potentiostat from Metrohm Instrument Company (Autolab 302). A three-electrode system consisting of a glassy carbon (GC) working electrode (5-mm in diameter), an Ag/AgCl reference electrode (in 4 M KCl) and a platinum wire counter electrode, was used.

**Catalyst Preparation:** The as-synthesized NPs were mixed with Ketjen-300 J carbon at a weight ratio of 1:1 in 20 mL mixture of hexane and sonicated for 1 h. The C-NPs were washed first with hexane and then with ethanol (twice for each step) and finally separated from the solvents by centrifugation. The C-NPs (both as-made C-NPs and commercial C-Ir) were suspended in a mixture of deionized water, isopropanol and Nafion (V/V/V=4/1/0.05) to form a catalyst ink (2 mg/ml). The glassy carbon (GC) rotating disk electrode (RDE) was polished by 0.1  $\mu\text{m}$  and 0.05  $\mu\text{m}$  alumina powder and rinsed with deionized water, followed by sonication in ethanol and deionized water. Unless specified, for each measurement, 20  $\mu\text{L}$  of the catalyst ink was deposited on the GC working electrode and dried at ambient conditions.

**Electrochemical Measurements:** All potentials reported on this paper are referenced to the reversible hydrogen electrode (RHE) potential. The 0 V point vs RHE was calibrated by measuring HOR/HER currents on the Pt electrode, where the potential at zero current corresponds to 0 V. Cyclic voltammograms (CVs) were obtained by scanning between 0.1 V to 1.5 V at a scan rate of 50 mV/s in  $\text{N}_2$ -saturated solution. OER polarization curves were obtained by linear sweep voltammetry scanning from 0.9 V to 2 V at a scan rate of 10 mV/s in  $\text{N}_2$ -saturated 0.1 M KOH with RDE at 1600 rpm.

**Table S1.** OER activities of Co-, Fe-, CoFe-, and Ir-based oxide/phosphide catalysts.

| Catalyst                                                                              | V (vs. RHE) at 10 mA/cm <sup>2</sup> | Electrolyte      | Reference                                                                                                                                                          |
|---------------------------------------------------------------------------------------|--------------------------------------|------------------|--------------------------------------------------------------------------------------------------------------------------------------------------------------------|
| Co <sub>x</sub> O <sub>y</sub> /NC                                                    | 1.66 V                               | 0.1 M KOH        | <i>Angew. Chem. Int. Ed.</i> <b>2014</b> , <i>53</i> , 8508                                                                                                        |
| Mesoporous Co <sub>3</sub> O <sub>4</sub> -35                                         | 1.76 V                               | 0.1M KOH         | <i>Nano Res</i> <b>2013</b> , <i>6</i> , 47-54                                                                                                                     |
| Co <sub>3</sub> O <sub>4</sub> shell/Au core NPs                                      | 1.62 V                               | 0.1 M KOH        | <i>Adv. Mater.</i> <b>2014</b> , <i>26</i> , 3950-3955                                                                                                             |
| Co <sub>3</sub> O <sub>4</sub> NPs / Ni foam                                          | 1.56 V<br>(5.9 nm NPs)               | <b>1 M KOH</b>   | <i>J Phys Chem C</i> <b>2009</b> , <i>113</i> ,15068-15072<br><b>Notice concentration of electrolyte</b>                                                           |
|                                                                                       | 1.59 V<br>(21 nm NPs)                | <b>1 M KOH</b>   |                                                                                                                                                                    |
|                                                                                       | 1.61 V<br>(46 nm NPs)                | <b>1 M KOH</b>   |                                                                                                                                                                    |
| Co <sub>3</sub> O <sub>4</sub> / N-graphene                                           | 1.63 V                               | 0.1 M KOH        | <i>Nat. Mat.</i> <b>2011</b> , <i>10</i> , 780-786<br><b>Notice concentration of electrolyte</b>                                                                   |
| Co <sub>3</sub> O <sub>4</sub> /N-graphene + Ni foam                                  | 1.54 V                               | <b>1 M OH</b>    |                                                                                                                                                                    |
| FeO(OH)/PtO substrate                                                                 | 1.76 V<br>(5 mA/cm <sup>2</sup> )    | 0.1 M KOH        | <i>Nat. Mat.</i> <b>2012</b> , <i>11</i> , 550–557<br><b>Note:</b> At 10 mA cm <sup>2</sup> the V will be even higher.                                             |
| CoO(OH)/PtO substrate                                                                 | 1.68 V<br>(5 mA/cm <sup>2</sup> )    | 0.1 M KOH        |                                                                                                                                                                    |
| Co <sub>3</sub> O <sub>4</sub> –CoFe <sub>2</sub> O <sub>4</sub> mesoporous composite | 1.73 V                               | 0.1 M KOH        | <i>Chem Mater</i> <b>2013</b> , <i>25</i> , 4926-4935.                                                                                                             |
| Crystalline CoFe <sub>2</sub> O <sub>4</sub>                                          | 1.79 V                               | 0.1 M KOH        | <i>J Am Chem Soc</i> <b>2014</b> , <i>136</i> , 17530-6.                                                                                                           |
| Amorphous CoFe <sub>2</sub> O <sub>4</sub>                                            | 1.72 V                               | 0.1 M KOH        |                                                                                                                                                                    |
| CoFe <sub>2</sub> O <sub>4</sub> /graphene                                            | 1.65 V                               | 0.1 M KOH        | <i>J. Power Sources</i> , <b>2014</b> , <i>250</i> , 196                                                                                                           |
| CoFeO <sub>x</sub> (Electrodeposited)                                                 | 1.60 V                               | <b>1 M NaOH</b>  | <i>J. Am. Chem. Soc.</i> , <b>2013</b> , <i>135</i> , 16977<br><b>Notice concentration of electrolyte</b>                                                          |
| CoFe <sub>2</sub> O <sub>4</sub> / (Triton X-100/Ni support)                          | 1.58 V                               | <b>1 M KOH</b>   | <i>Int. J. Hyd. Energy</i> , <b>1999</b> , <i>24</i> , 433<br><b>Notice concentration of electrolyte</b>                                                           |
| Co/Fe oxide 64                                                                        | 1.73 V                               | 0.1 M KOH        | <i>Chem. Mater.</i> , <b>2014</b> , <i>26</i> , 3162–3168<br><b>Note:</b> Fe-doped Co <sub>3</sub> O <sub>4</sub> (hard templating). Number corresponds to ratios. |
| Co/Fe oxide 32                                                                        | 1.73 V                               | 0.1 M KOH        |                                                                                                                                                                    |
| Co/Fe oxide 16                                                                        | 1.74 V                               | 0.1 M KOH        |                                                                                                                                                                    |
| Co/Fe oxide 7                                                                         | 1.76 V                               | 0.1 M KOH        |                                                                                                                                                                    |
| Co/Fe oxide 3                                                                         | 1.83 V                               | 0.1 M KOH        |                                                                                                                                                                    |
| Co/Fe oxide 1                                                                         | 1.90 V                               | 0.1 M KOH        |                                                                                                                                                                    |
| IrO <sub>2</sub> NPs                                                                  | >1.70 V                              | 0.1 M KOH        | <i>J. Phys. Chem. Lett.</i> <b>2012</b> , <i>3</i> , 399                                                                                                           |
| IrO <sub>2</sub> /C                                                                   | 1.60 V                               | 0.1 M KOH        | <i>Nat Commun.</i> <b>2013</b> , <i>4</i> , 1-7                                                                                                                    |
| IrO <sub>2</sub> thin film                                                            | 1.63 V<br>~18 mA/cm <sup>2</sup>     | 0.1 M KOH        | <i>Science</i> <b>2011</b> , <i>334</i> , 1383-1385                                                                                                                |
| CoP nanorods/C                                                                        | 1.55 V                               | <b>1 M KOH</b>   | <i>ACS Catal.</i> <b>2015</b> , <i>5</i> , 6874-6878                                                                                                               |
| Commercial C-Ir (Premetek)                                                            | 1.62 V                               | 0.1 M KOH        | This work                                                                                                                                                          |
| CoO/C nanocubes                                                                       | 1.74 V                               | 0.1 M KOH        | This work                                                                                                                                                          |
| Fe <sub>3</sub> O <sub>4</sub> /C nanocubes                                           | 1.91 V                               | 0.1 M KOH        | This work                                                                                                                                                          |
| Co <sub>1.32</sub> Fe <sub>1.68</sub> O <sub>4</sub> /C nanocubes                     | 1.70 V                               | 0.1 M KOH        | This work                                                                                                                                                          |
| Co <sub>2</sub> P/C NPs                                                               | 1.66 V                               | 0.1 M KOH        | This work                                                                                                                                                          |
| Fe <sub>2</sub> P/C nanowires                                                         | 1.79 V                               | 0.1 M KOH        | This work                                                                                                                                                          |
| (Co <sub>0.54</sub> Fe <sub>0.46</sub> ) <sub>2</sub> P/C                             | <b>1.51 V</b>                        | <b>1 M KOH</b>   | <i>Angew. Chem. Int. Ed.</i> <b>2015</b> , <i>127</i> , 9778                                                                                                       |
|                                                                                       | <b>1.60 V</b>                        | <b>0.1 M KOH</b> | This work                                                                                                                                                          |

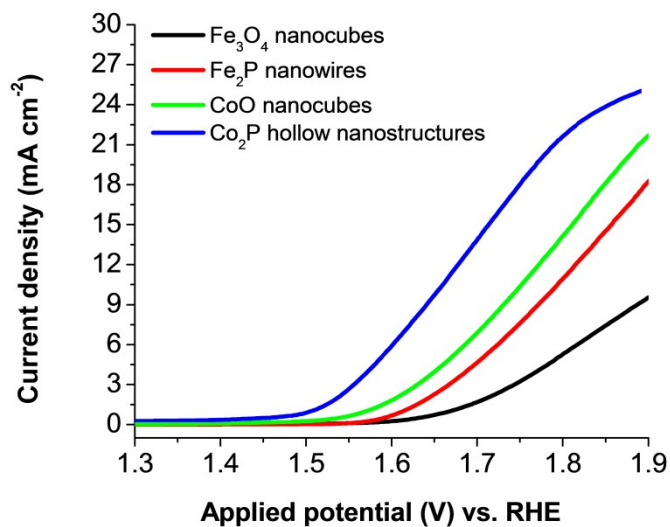

**Figure S1.** OER polarization curves of C-Co- and C-Fe-based NPs at 1600 rpm in N<sub>2</sub>-saturated 0.1 M KOH at a scan rate of 10 mV/s.

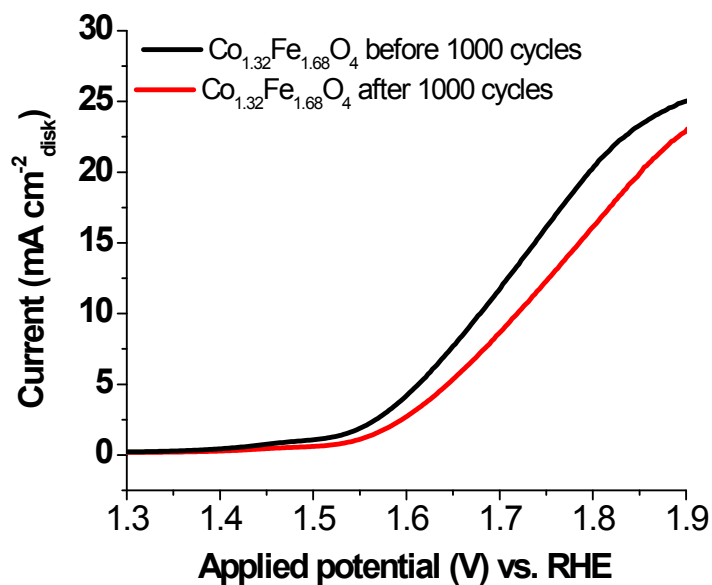

**Figure S2.** OER polarization curves for the C- Co<sub>1.32</sub>Fe<sub>1.68</sub>O<sub>4</sub> nanocubes before and after 1000 potential cycles (between 1.4 and 1.8 V) in 0.1 M KOH.
